# Supplementary material for: Comparison of Effectiveness regarding a Culinary Medicine Elective for Medical Students in Germany Delivered Virtually versus In-Person
Source: MDPI journal article supplement (doi:10.3390/nu15194281), 2023-10-08
Supplement: s1 [file s1]

## Supplementary Materials

**Table S1.** Counselling competencies paired *t*-test.

| Topic                         | T-Value (t), Virtual | Degrees of Freedom (df), Virtual | Significance (p) (2-Tailed), Virtual | Cohen's d, Virtual | T-Value (t), In-Person | Degrees of Freedom (df), In-Person | Significance (p) (2-Tailed), In-Person | Cohen's d, In-Person |
|-------------------------------|----------------------|----------------------------------|--------------------------------------|--------------------|------------------------|------------------------------------|----------------------------------------|----------------------|
| Mediterranean Diet            | -6.64                | 69                               | <0.001                               | 1.03               | -9.60                  | 79                                 | <0.001                                 | 1.04                 |
| Nutrition                     |                      |                                  |                                      |                    |                        |                                    |                                        |                      |
| Arterial Hypertension         | -7.14                | 69                               | <0.001                               | 1.24               | -8.44                  | 79                                 | <0.001                                 | 1.16                 |
| Vegetarian Diet               | -6.83                | 69                               | <0.001                               | 1.00               | -7.45                  | 79                                 | <0.001                                 | 0.960                |
| Low-Fat Diet                  | -6.97                | 69                               | <0.001                               | 0.91               | -6.67                  | 79                                 | <0.001                                 | 1.02                 |
| High-Protein Diet             | -7.33                | 69                               | <0.001                               | 1.08               | -7.56                  | 79                                 | <0.001                                 | 1.12                 |
| Serving Size                  | -6.09                | 69                               | <0.001                               | 1.30               | -8.71                  | 79                                 | <0.001                                 | 1.07                 |
| Moderate Alcohol              | -3.62                | 69                               | 0.001                                | 1.19               | -6.57                  | 79                                 | <0.001                                 | 1.003                |
| Eating Disorders              | -5.94                | 69                               | <0.001                               | 1.17               | -5.97                  | 79                                 | <0.001                                 | 1.048                |
| Cholesterol                   | -4.95                | 69                               | <0.001                               | 1.21               | -6.54                  | 79                                 | <0.001                                 | 1.025                |
| Diabetes Diet                 | -6.88                | 69                               | <0.001                               | 1.27               | -9.18                  | 79                                 | <0.001                                 | 1.14                 |
| Diabetes Weight Loss          | -8.61                | 69                               | <0.001                               | 1.19               | -8.39                  | 79                                 | <0.001                                 | 1.14                 |
| Obesity Weight Loss           | -8.06                | 69                               | <0.001                               | 1.22               | -8.75                  | 79                                 | <0.001                                 | 1.14                 |
| Omega Fats $\omega$ -3 and -6 | -6.21                | 69                               | <0.001                               | 1.31               | -10.23                 | 79                                 | <0.001                                 | 1.26                 |
| Dietary Fats                  | -6.37                | 69                               | <0.001                               | 1.35               | -8.61                  | 79                                 | <0.001                                 | 1.08                 |
| Antioxidants                  | -6.71                | 69                               | <0.001                               | 1.14               | -7.08                  | 79                                 | <0.001                                 | 1.22                 |
| Calories                      | -7.01                | 69                               | <0.001                               | 1.21               | -7.77                  | 79                                 | <0.001                                 | 1.2                  |
| Hydration                     | -5.23                | 69                               | <0.001                               | 1.07               | -5.54                  | 79                                 | <0.001                                 | 1.10                 |
| Celiac Disease                | -8.08                | 69                               | <0.001                               | 1.33               | -11.39                 | 79                                 | <0.001                                 | 1.33                 |
| Food Allergies                | -9.07                | 69                               | <0.001                               | 1.25               | -12.38                 | 79                                 | <0.001                                 | 1.20                 |
| Glycaemic Index               | -6.08                | 69                               | <0.001                               | 1.41               | -10.53                 | 79                                 | <0.001                                 | 1.20                 |
| Fibre                         | -7.72                | 69                               | <0.001                               | 1.18               | -10.47                 | 79                                 | <0.001                                 | 1.18                 |
| Food Label                    | -7.08                | 69                               | <0.001                               | 1.38               | -9.78                  | 79                                 | <0.001                                 | 1.25                 |
| Osteoporosis                  | -8.90                | 69                               | <0.001                               | 1.37               | -9.82                  | 79                                 | <0.001                                 | 1.32                 |
| BMI                           | -5.46                | 69                               | <0.001                               | 1.16               | -8.67                  | 79                                 | <0.001                                 | 0.98                 |
| Aerobic Exercise              | -5.37                | 69                               | <0.001                               | 1.25               | -5.94                  | 79                                 | <0.001                                 | 1.09                 |

**Table S2.** Counselling competencies unpaired *t*-test.

|                                 | T-Value (t) | Degrees of Freedom (df) | Significance (p) (2-Tailed) | Cohen's d |
|---------------------------------|-------------|-------------------------|-----------------------------|-----------|
| Mediterranean Diet              | 1.83        | 148                     | 0.69                        | 1.03      |
| Nutrition Arterial Hypertension | 0.21        | 148                     | 0.82                        | 1.19      |
| Vegetarian Diet                 | -0.89       | 148                     | 0.92                        | 0.97      |
| Low-Fat Diet                    | 0.43        | 148                     | 0.66                        | 0.95      |
| High-Protein Diet               | 0.04        | 148                     | 0.96                        | 1.10      |
| Serving Size                    | 0.55        | 148                     | 0.58                        | 1.18      |
| Moderate Alcohol                | 1.24        | 148                     | 0.21                        | 1.09      |
| Eating Disorders                | -0.71       | 148                     | 0.47                        | 1.10      |

|                                           |       |     |      |      |
|-------------------------------------------|-------|-----|------|------|
| Cholesterol                               | 0.19  | 148 | 0.84 | 1.11 |
| Diabetes Diet                             | 0.67  | 148 | 0.50 | 1.20 |
| Diabetes Weight Loss                      | -0.80 | 148 | 0.42 | 1.16 |
| Obesity Weight Loss                       | 0.14  | 148 | 0.88 | 1.22 |
| Omega Fats ( $\omega$ -3 and $\omega$ -6) | 1.36  | 148 | 0.17 | 1.11 |
| Dietary Fats                              | 0.69  | 148 | 0.48 | 1.28 |
| Antioxidants                              | 0.18  | 148 | 0.85 | 1.17 |
| Calories                                  | -2.74 | 148 | 0.78 | 1.24 |
| Hydration                                 | 0.09  | 148 | 0.92 | 1.09 |
| Celiac Disease                            | 1.89  | 148 | 0.60 | 1.33 |
| Food Allergies                            | 1.58  | 148 | 0.11 | 1.22 |
| Glycaemic Index                           | 1.85  | 148 | 0.66 | 1.30 |
| Fibre                                     | 1.56  | 148 | 0.12 | 1.18 |
| Food Label                                | 1.78  | 148 | 0.07 | 1.23 |
| Osteoporosis                              | -0.03 | 148 | 0.97 | 1.34 |
| BMI                                       | 1.85  | 148 | 0.66 | 1.06 |
| Aerobic Exercise                          | -0.39 | 148 | 0.69 | 1.16 |

**Table S3.** Attitudes towards nutrition counselling in medical practice paired *t*-test.

| Question                                            | T-Value (t), Virtual | Degrees of Freedom (df), Virtual | Significance (p) (2-Tailed), Virtual | Cohen's d, Virtual | T-Value (t), In-Person | Degrees of Freedom (df), In-Person | Significance (p) (2-Tailed), In-Person | Cohen's d, In-Person |
|-----------------------------------------------------|----------------------|----------------------------------|--------------------------------------|--------------------|------------------------|------------------------------------|----------------------------------------|----------------------|
| Nutrition counselling should be routine             | -2.77                | 69                               | 0.007                                | 0.60               | -2.13                  | 79                                 | 0.036                                  | 0.94                 |
| Specific counselling can improve patients' diet     | -2.41                | 69                               | 0.019                                | 0.35               | -2.83                  | 79                                 | 0.006                                  | 0.71                 |
| Physicians' counselling can improve patients' diets | -3.64                | 69                               | 0.001                                | 0.76               | -4.22                  | 79                                 | <0.001                                 | 0.76                 |

**Table S4.** Attitudes towards nutrition counselling in medical practice unpaired *t*-test.

| Question                                            | T-Value (t) | Degrees of Freedom (df) | Significance (p) (2-Tailed) | Cohen's d |
|-----------------------------------------------------|-------------|-------------------------|-----------------------------|-----------|
| Nutrition counselling should be routine             | 0.191       | 148                     | 0.849                       | 0.801     |
| Specific counselling can improve patients' diet     | 1.338       | 148                     | 0.183                       | 0.570     |
| Physicians' counselling can improve patients' diets | 0.272       | 148                     | 0.786                       | 0.761     |

**Table S5.** Nutrition Knowledge paired *t*-test.

| Question | T-Value (t), Virtual | Degrees of Freedom (df), Virtual | Significance (p) (2-Tailed), Virtual | Cohen's d, Virtual | T-Value (t), In-Person | Degrees of Freedom (df), In-Person | Significance (p) (2-Tailed), In-Person | Cohen's d, In-Person |
|----------|----------------------|----------------------------------|--------------------------------------|--------------------|------------------------|------------------------------------|----------------------------------------|----------------------|
|----------|----------------------|----------------------------------|--------------------------------------|--------------------|------------------------|------------------------------------|----------------------------------------|----------------------|

|                                    |       |    |        |      |       |    |        |      |
|------------------------------------|-------|----|--------|------|-------|----|--------|------|
| 1. Recommended diet form           | -4.19 | 69 | <0.001 | 0.46 | -3.83 | 79 | <0.001 | 0.49 |
| 2. Carbohydrate percentage         | -7.93 | 69 | <0.001 | 0.56 | -3.83 | 79 | 0.001  | 0.59 |
| 3. Salt                            | -6.77 | 69 | <0.001 | 0.58 | -5.59 | 79 | <0.001 | 0.57 |
| 4. Free sugar                      | -0.87 | 69 | 0.388  | 0.69 | -3.19 | 79 | 0.002  | 0.56 |
| 5. Recommended protein             | -3.86 | 69 | <0.001 | 0.59 | -5.39 | 79 | <0.001 | 0.6  |
| 6. Malnutrition syndrome           | -3.93 | 69 | <0.001 | 0.49 | -4.13 | 79 | <0.001 | 0.43 |
| 7. Therapy, obesity                | -2.17 | 69 | 0.034  | 0.39 | 0.19  | 79 | 0.002  | 0.49 |
| 8. Gout                            | -2.30 | 69 | 0.024  | 0.52 | -4.13 | 79 | 0.843  | 0.56 |
| 9. Monosaccharide gout             | -5.76 | 69 | <0.001 | 0.60 | -3.14 | 79 | <0.001 | 0.56 |
| 10. Dyslipoproteinemia             | 0.75  | 69 | 0.454  | 0.63 | 0.37  | 79 | 0.708  | 0.59 |
| 11. Cereals for celiac disease     | -4.53 | 69 | <0.001 | 0.61 | -2.8  | 79 | 0.006  | 0.59 |
| 12. Chronic kidney disease therapy | -1.63 | 69 | 0.109  | 0.51 | -0.78 | 79 | 0.436  | 0.57 |
| 13. Calcium oxalate stones         | -4.20 | 69 | <0.001 | 0.60 | -6.01 | 79 | <0.001 | 0.50 |
| 14. Fructose malabsorption         | -5.64 | 69 | <0.001 | 0.57 | -2.7  | 79 | 0.008  | 0.53 |
| 15. Omega-3 fatty acid             | -2.85 | 69 | 0.006  | 0.55 | -4.13 | 79 | <0.001 | 0.56 |
| 16. Calcium and Vitamin D          | -1.43 | 69 | 0.159  | 0.67 | -0.35 | 79 | 0.726  | 0.63 |

**Table S6.** Nutrition Knowledge unpaired *t*-test.

| Question                           | T-Value ( <i>t</i> ) | Degrees of Freedom (df) | Significance ( <i>p</i> ) (2-Tailed) | Cohen's <i>d</i> |
|------------------------------------|----------------------|-------------------------|--------------------------------------|------------------|
| 1. Recommended diet form           | -0.206               | 148                     | 0.837                                | 0.477            |
| 2. Carbohydrate percentage         | -3.211               | 148                     | 0.002                                | 0.577            |
| 3. Salt                            | -1.146               | 148                     | 0.254                                | 0.58             |
| 4. Free sugar                      | 1.261                | 148                     | 0.209                                | 0.623            |
| 5. Recommended protein             | 0.936                | 148                     | 0.351                                | 0.594            |
| 6. Malnutrition syndrome           | -0.381               | 148                     | 0.704                                | 0.458            |
| 7. Therapy obesity                 | 1.02                 | 148                     | 0.309                                | 0.449            |
| 8. Gout                            | -1.75                | 148                     | 0.082                                | 0.542            |
| 9. Monosaccharide gout             | -1.588               | 148                     | 0.114                                | 0.583            |
| 10. Dyslipoproteinemia             | 0.818                | 148                     | 0.415                                | 0.613            |
| 11. Cereals for celiac disease     | 0.595                | 148                     | 0.008                                | 0.614            |
| 12. Chronic kidney disease therapy | 0.315                | 148                     | 0.139                                | 0.601            |
| 13. Calcium oxalate stones         | 0.561                | 148                     | <0.001                               | 0.567            |
| 14. Fructose malabsorption         | 0.622                | 148                     | 0.012                                | 0.585            |
| 15. Omega-3 fatty acid             | 0.433                | 148                     | <0.001                               | 0.599            |
| 16. Calcium and Vitamin D          | 0.830                | 148                     | 0.215                                | 0.638            |

Table S7. WHO-5 well-being index (\*  $p \leq 0.001$ ; \*\*  $p = 0.004$ ).

| Mean Score before Virtual (SD) | Mean Score after Virtual (SD) | Mean Difference, Virtual (SD) | Mean Score before In-Person (SD) | Mean Score after In-Person (SD) | Mean Difference, In-Person (SD) |
|--------------------------------|-------------------------------|-------------------------------|----------------------------------|---------------------------------|---------------------------------|
| 15.2 (3.60)                    | 16.6 (3.37)                   | -1.4 (3.28) *                 | 14.73 (4.89)                     | 16.2 (4.49)                     | -1.46 (4.34) **                 |

Table S8. WHO-5 well-being Index paired  $t$ -test.

| T-Value, Virtual | Degree of Freedom, Virtual | Significance ( $p$ ) (2-Tailed), Virtual | Cohen's d, Virtual | T-Value, In-Person | Degree of Freedom, In-Person | Significance ( $p$ ) (2-Tailed), In-Person | Cohen's d, In-Person |
|------------------|----------------------------|------------------------------------------|--------------------|--------------------|------------------------------|--------------------------------------------|----------------------|
| -3.560           | 69                         | <0.001                                   | 3.289              | -3.008             | 79                           | 0.004                                      | 4.348                |

Table S9. WHO-5 well-being Index unpaired  $t$ -test.

| T-Value | Degree of Freedom | Significance ( $p$ ) (2-Tailed) | Cohen's d |
|---------|-------------------|---------------------------------|-----------|
| 0.098   | 148               | 0.922                           | 3.890     |

Table S10. Eating Habits Mean Difference.

|                    | Mean, Before Virtual | Mean, After Virtual | Mean Difference, Virtual | Mean, Before In-Person | Mean, After In-Person | Mean Difference, In-Person |
|--------------------|----------------------|---------------------|--------------------------|------------------------|-----------------------|----------------------------|
| Vegetables         | 4.37 (0.93)          | 4.33 (0.81)         | 0.04 (0.66)              | 4.13 (0.96)            | 4.30 (0.96)           | -0.07 (0.85)               |
| Legumes            | 2.40 (1.05)          | 2.56 (0.95)         | -0.15 (0.75)             | 2.06 (0.81)            | 2.30 (0.64)           | -0.23 (0.76) *             |
| Fruit              | 3.99 (1.14)          | 4.00 (1.00)         | -0.01 (0.78)             | 3.81 (1.08)            | 3.96 (1.08)           | -0.15 (0.88) *             |
| Nuts               | 2.87 (1.36)          | 3.03 (1.14)         | -0.15 (1.07)             | 2.68 (1.05)            | 2.65 (1.04)           | 0.02 (0.92)                |
| Milk products      | 3.56 (1.35)          | 3.47 (1.31)         | 0.086 (1.03)             | 3.75 (1.22)            | 3.61 (1.09)           | 0.13 (0.95)                |
| Meat               | 1.80 (1.08)          | 1.60 (0.92)         | 0.20 (0.65) *            | 1.65 (0.90)            | 1.56 (0.77)           | 0.08 (0.48)                |
| Fish               | 1.36 (0.56)          | 1.44 (0.62)         | -0.08 (0.63)             | 1.24 (0.42)            | 1.44 (0.54)           | -0.20 (0.48) *             |
| Whole grain        | 3.36 (1.28)          | 3.51 (1.11)         | -0.15 (1.16)             | 3.36 (1.07)            | 3.31 (1.08)           | 0.05 (1.2)                 |
| Vegetable oil      | 4.13 (0.90)          | 4.03 (0.90)         | 0.1 (0.93)               | 3.56 (1.017)           | 3.66 (1.03)           | -0.10(1.01)                |
| Alcohol            | 1.60 (0.62)          | 1.60 (0.66)         | 0 (0.45)                 | 1.83 (0.725)           | 1.66 (0.655)          | 0.16 (0.43) *              |
| Sweets             | 2.60 (0.95)          | 2.36 (0.94)         | 0.24 (0.71) *            | 2.64 (1.07)            | 2.54 (1.030)          | 0.10(0.75)                 |
| Calorie beverages  | 1.80 (1.04)          | 1.63 (0.87)         | 0.17 (1.00)              | 1.76 (0.79)            | 1.61 (0.738)          | 0.15 (0.57)                |
| Butter             | 2.93 (1.34)          | 2.81 (1.20)         | 0.11 (1.02)              | 2.61 (1.21)            | 2.51 (1.07)           | 100 (0.88)                 |
| Favourable foods   | 24.4 (4.07)          | 22.09 (3.83)        | 1.50 (3.09) *            | 20.83 (3.83)           | 21.52 (3.52)          | -0.68 (3.37)               |
| Unfavourable foods | 10.72 (2.80)         | 10.0 (2.54)         | 0.72 (1.76) *            | 10.48 (2.79)           | 9.88 (2.21)           | 0.6 (1.76) *               |

Differences in consumption frequency (\*  $p \leq 0.012$  compared to baseline).Table S11. Eating Habits paired  $t$ -test.

|            | T-Value, Virtual | Degree of Freedom | Significance ( $p$ ) (2-Tailed), Virtual | Cohen's d, Virtual | T-Value Präsenz | Degree of Freedom | Significance ( $p$ ) (2-Tailed) | Cohen's d |
|------------|------------------|-------------------|------------------------------------------|--------------------|-----------------|-------------------|---------------------------------|-----------|
| Vegetables | 0.536            | 69                | 0.594                                    | 0.669              | -0.786          | 79                | 0.434                           | 0.854     |
| Legumes    | -1.743           | 69                | 0.086                                    | 0.754              | -2.769          | 79                | 0.007                           | 0.767     |
| Fruit      | -0.151           | 69                | 0.880                                    | 0.789              | -1.512          | 79                | 0.135                           | 0.887     |
| Nuts       | -1.227           | 69                | 0.224                                    | 1.072              | 0.241           | 79                | 0.810                           | 0.927     |
| Milk       | 0.695            | 69                | 0.489                                    | 1.032              | 1.293           | 79                | 0.200                           | 0.951     |
| Meat       | 2.572            | 69                | 0.012                                    | 0.651              | 1.622           | 79                | 0.109                           | 0.482     |

|              |        |    |        |       |        |    |        |       |
|--------------|--------|----|--------|-------|--------|----|--------|-------|
| Fish         | -1.136 | 69 | 0.260  | 0.631 | -3.667 | 79 | <0.001 | 0.488 |
| Whole Grain  | -1.131 | 69 | 0.262  | 1.163 | 0.373  | 79 | 0.710  | 1.2   |
| Oil          | 0.895  | 69 | 0.374  | 0.935 | -0.882 | 79 | 0.38   | 1.014 |
| Alcohol      | 0      | 69 | 1.0    | 0.450 | 3.348  | 79 | 0.001  | 0.434 |
| Sweets       | 2.858  | 69 | 0.006  | 0.711 | 1.182  | 79 | 0.241  | 0.756 |
| Lemonade     | 1.425  | 69 | 0.159  | 1.007 | 2.330  | 79 | 0.22   | 0.576 |
| Butter       | 0.929  | 69 | 0.356  | 1.029 | 1.016  | 79 | 0.313  | 0.880 |
| Favourable   | 4.053  | 69 | <0.001 | 3.096 | -1.821 | 79 | 0.72   | 3.377 |
| Unfavourable | 3.446  | 69 | <0.001 | 1.788 | 3.034  | 79 | 0.003  | 1.785 |

**Table S12.** Eating Habits unpaired *t*-test.

|                         | <b>T-Value,<br/>Virtual</b> | <b>Degree of<br/>Freedom</b> | <b>Significance (<i>p</i>) (2-<br/>Tailed)</b> | <b>Cohen's <i>d</i></b> |
|-------------------------|-----------------------------|------------------------------|------------------------------------------------|-------------------------|
| Vegetables              | 0.932                       | 148                          | 0.353                                          | 0.772                   |
| Legumes                 | 0.645                       | 148                          | 0.520                                          | 0.765                   |
| Fruit                   | 0.984                       | 148                          | 0.327                                          | 0.843                   |
| Nuts                    | -1.116                      | 148                          | 0.266                                          | 0.997                   |
| Milk                    | -0.32                       | 148                          | 0.750                                          | 0.989                   |
| Meat                    | 1.212                       | 148                          | 0.227                                          | 0.567                   |
| Fish                    | 1.249                       | 148                          | 0.214                                          | 0.559                   |
| Whole Grain             | -1.070                      | 148                          | 0.286                                          | 1.182                   |
| Oil                     | 1.250                       | 148                          | 0.213                                          | 0.977                   |
| Alcohol                 | -2.247                      | 148                          | 0.026                                          | 0.441                   |
| Sweets                  | 1.187                       | 148                          | 0.237                                          | 0.735                   |
| Lemonade                | 0.162                       | 148                          | 0.871                                          | 0.805                   |
| Butter                  | 0.092                       | 148                          | 0.927                                          | 0.952                   |
| Favourable, Before      | -5.51                       | 148                          | <0.001                                         | 3.950                   |
| Favourable, After       | -2.286                      | 148                          | 0.024                                          | 3.674                   |
| Unfavourable,<br>Before | -0.526                      | 148                          | 0.600                                          | 2.799                   |
| Unfavourable,<br>After  | -0.290                      | 148                          | 0.772                                          | 2.37                    |

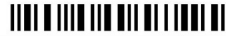

Liebe Studierenden,

vielen Dank für Ihre Bereitschaft an der Umfrage mitzuwirken!

Bitte generieren Sie als erstes einen persönlichen 10-stelligen Code gemäß nachfolgendem Muster:

Felder 1 und 2 sind für den Ort des Kurses. Felder 3 und 4 entsprechen jeweils dem zweiten Buchstaben Ihres Vornamens und Nachnamens, Felder 5 und 6 dem Tag ihres Geburtstages, Felder 7 und 8 den Initialen des Namens Ihrer Mutter. Die letzten beiden Felder 9 und 10 entsprechen den ersten beiden Buchstaben Ihres Geburtsortes.

Beispiel: Kurs in Göttingen Frieda von Dannen, \*17.12.1996; Wilma von Dannen, München

GÖ- R A 1 7 W D M Ü

Bitte generieren Sie Ihren Code hier (*Gilt nur für den Papierfragebogen*):

#### Teil A: Umfrageorganisation

Die folgenden Angaben dienen zur späteren Auswertung nach Kohorten

A1. Ihr Name: / Ihr Code:

*Bitte generieren Sie als erstes einen persönlichen 10-stelligen Code gemäß nachfolgendem Muster:*

*Felder 1 und 2 sind für den Ort des Kurses. Felder 3 und 4 entsprechen jeweils dem zweiten Buchstaben Ihres Vornamens und Nachnamens, Felder 5 und 6 dem Tag ihres Geburtstages, Felder 7 und 8 den Initialen des Namens Ihrer Mutter. Die letzten beiden Felder 9 und 10 entsprechen den ersten beiden Buchstaben Ihres Geburtsortes.*

*Beispiel: Kurs in Göttingen Frieda von Dannen, \*17.12.1996; Wilma von Dannen, München*

*GÖ- R A 1 7 W D M Ü*

A2. Kursnummer:

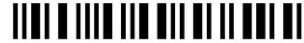

**A3. Erhebungszeitpunkt der Umfrage**

Vorbefragung (vor Kursbeginn) ☐

Nachbefragung (nach Kursende) ☐

Sonderbefragung (ohne Zuordnung Kursbeginn/-ende) ☐

**A4. Angabe des aktuellen Semesters (Jahr)**

Sommersemester 2020 ☐

Wintersemester 2020/2021 ☐

Sommersemester 2021 ☐

Wintersemester 2021/2022 ☐

Sommersemester 2022 ☐

Wintersemester 2022/2023 ☐

**A5. In welchem klinischen Semester befinden Sie sich zur Zeit?**

1 ☐

2 ☐

3 ☐

4 ☐

5 ☐

**A6. Bitte geben Sie Ihr Geschlecht an.**

w ☐

m ☐

d ☐

**A7. Wie alt sind Sie?**

**A8. Haben Sie bereits eine Ausbildung vor dem Studium gemacht? Wenn ja, welche?**

JA, berufliche Ausbildung vor dem Medizinstudium ☐

Kommentar

JA, akademische Ausbildung vor dem Medizinstudium ☐

Kommentar

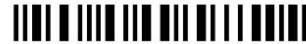

NEIN, keine Ausbildung vor dem Medizinstudium

☐

Kommentar

**A9. Haben Sie bisher schon einmal an einem Kochkurs teilgenommen?**

JA, an der Universität Göttingen ☐

JA, außerhalb der Uni Göttingen ☐

NEIN ☐

**Teil B: Fragebogen zur ernährungsmedizinischen Beratungspraxis -Studierende-**

**B1. Ich koche selber**

1x pro Monat/nie ☐

1-2 x pro Woche ☐

3-5 x pro Woche ☐

5-7 x pro Woche ☐

Täglich/ öfter ☐

**B2. Ich esse (alle Gelegenheiten, zu Hause und außer Haus) ...**

|                                                                                                          | 1x pro<br>Monat/nie      | 1-2 x pro<br>Woche       | 3-5 x pro<br>Woche       | 5-7 x pro<br>Woche       | Täglich/<br>öfter        |
|----------------------------------------------------------------------------------------------------------|--------------------------|--------------------------|--------------------------|--------------------------|--------------------------|
| Gemüse (z.B. Karotten, Spinat oder Tomaten)                                                              | <input type="checkbox"/> |
| Hülsenfrüchte (z.B. Bohnen, Erbsen oder Linsen)                                                          | <input type="checkbox"/> |
| Obst (z.B. Orangen, Äpfel oder Bananen)                                                                  | <input type="checkbox"/> |
| Nüsse oder Nussbutter (z.B. Erdnüsse, Mandeln, Walnüsse oder Cashews)                                    | <input type="checkbox"/> |
| Käse oder Milchprodukte (z.B. Joghurt)                                                                   | <input type="checkbox"/> |
| Rotes und verarbeitetes Fleisch (z.B. Wurst, Schinken, Kotelett, Döner, Hamburger, Steak, Hot Dogs usw.) | <input type="checkbox"/> |
| Nicht-frittierte Fisch oder Meeresfrüchte (z.B. konserviert, gebacken oder gegrillt)                     | <input type="checkbox"/> |
| Vollkornprodukte (z.B. Vollkornbrot, Vollkornnudeln, Hafer, brauner Reis)                                | <input type="checkbox"/> |
| Pflanzenöle wie Rapsöl, Sonnenblumenöl und Olivenöl                                                      | <input type="checkbox"/> |
| Eine Alkoholportion (entspricht 0,33l Bier/0,1 l Wein/2-4cl Schnaps)                                     | <input type="checkbox"/> |
| Süßes Gebäck (z.B. Kekse, Muffins, Kuchen, Doughnuts)                                                    | <input type="checkbox"/> |
| Kalorienhaltige Getränke (z.B. Limonaden, Colagetränke, Fruchtsaftgetränke, Energydrinks)                | <input type="checkbox"/> |
| Butter, Kokosfett, Vollmilchprodukte                                                                     | <input type="checkbox"/> |



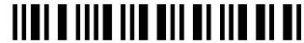

**B3. Meine persönliche Einstellung zur Ernährungsberatung in der ärztlichen Praxis ist...**

|                                                                                                                                                  | Stimme<br>gar nicht<br>zu | Stimme<br>eher nicht<br>zu | Teils/Teils              | Stimme<br>eher zu        | Stimme<br>voll zu        |
|--------------------------------------------------------------------------------------------------------------------------------------------------|---------------------------|----------------------------|--------------------------|--------------------------|--------------------------|
| Beratung zu Ernährungsfragen sollte Teil jeder ärztlichen Beratung sein,<br>genau wie die Therapie und die Diagnose.                             | <input type="checkbox"/>  | <input type="checkbox"/>   | <input type="checkbox"/> | <input type="checkbox"/> | <input type="checkbox"/> |
| Spezifische Empfehlungen zur Änderung des Essverhaltens können<br>Patienten bei der Verbesserung ihrer Essgewohnheiten helfen.                   | <input type="checkbox"/>  | <input type="checkbox"/>   | <input type="checkbox"/> | <input type="checkbox"/> | <input type="checkbox"/> |
| Ärzte können Einfluss auf die Essgewohnheiten ihrer Patienten nehmen,<br>wenn sie sich Zeit nehmen, das Problem mit den Patienten zu besprechen. | <input type="checkbox"/>  | <input type="checkbox"/>   | <input type="checkbox"/> | <input type="checkbox"/> | <input type="checkbox"/> |

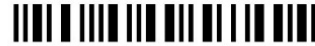

**B4. Ich bin zuversichtlich, meine Patientinnen/Patienten zu folgenden Themen zu beraten...**

|                                                                                                                               | Stimme<br>gar nicht<br>zu | Stimme<br>eher nicht<br>zu | Teils/Teils              | Stimme<br>eher zu        | Stimme<br>voll zu        |
|-------------------------------------------------------------------------------------------------------------------------------|---------------------------|----------------------------|--------------------------|--------------------------|--------------------------|
| Mediterrane Ernährung und ihr gesundheitlicher Effekt                                                                         | <input type="checkbox"/>  | <input type="checkbox"/>   | <input type="checkbox"/> | <input type="checkbox"/> | <input type="checkbox"/> |
| Die richtige Ernährung bei arteriellem Hypertonus                                                                             | <input type="checkbox"/>  | <input type="checkbox"/>   | <input type="checkbox"/> | <input type="checkbox"/> | <input type="checkbox"/> |
| Vegetarische Ernährung und ihr gesundheitlicher Effekt                                                                        | <input type="checkbox"/>  | <input type="checkbox"/>   | <input type="checkbox"/> | <input type="checkbox"/> | <input type="checkbox"/> |
| Fettarme Ernährung und ihr gesundheitlicher Effekt                                                                            | <input type="checkbox"/>  | <input type="checkbox"/>   | <input type="checkbox"/> | <input type="checkbox"/> | <input type="checkbox"/> |
| Eiweißreiche Ernährung und ihr gesundheitlicher Effekt                                                                        | <input type="checkbox"/>  | <input type="checkbox"/>   | <input type="checkbox"/> | <input type="checkbox"/> | <input type="checkbox"/> |
| Beratung zu richtigen Portionsgrößen                                                                                          | <input type="checkbox"/>  | <input type="checkbox"/>   | <input type="checkbox"/> | <input type="checkbox"/> | <input type="checkbox"/> |
| Definition von moderatem Alkoholkonsum und dessen gesundheitlicher Effekt                                                     | <input type="checkbox"/>  | <input type="checkbox"/>   | <input type="checkbox"/> | <input type="checkbox"/> | <input type="checkbox"/> |
| Das Erkennen von Warnzeichen und Symptomen von Patienten mit Essstörungen                                                     | <input type="checkbox"/>  | <input type="checkbox"/>   | <input type="checkbox"/> | <input type="checkbox"/> | <input type="checkbox"/> |
| Die Rolle von (Nahrungs-)Cholesterin und gesättigten Fettsäuren auf die Blutlipide                                            | <input type="checkbox"/>  | <input type="checkbox"/>   | <input type="checkbox"/> | <input type="checkbox"/> | <input type="checkbox"/> |
| Ernährungsempfehlungen bei Diabetes Typ 2                                                                                     | <input type="checkbox"/>  | <input type="checkbox"/>   | <input type="checkbox"/> | <input type="checkbox"/> | <input type="checkbox"/> |
| Bedeutung von angemessenem Gewichtsverlust für Diabetes Typ 2                                                                 | <input type="checkbox"/>  | <input type="checkbox"/>   | <input type="checkbox"/> | <input type="checkbox"/> | <input type="checkbox"/> |
| Strategien zur Gewichtsreduktion bei Adipositas                                                                               | <input type="checkbox"/>  | <input type="checkbox"/>   | <input type="checkbox"/> | <input type="checkbox"/> | <input type="checkbox"/> |
| Die Rolle von Omega-3 und -6-Fettsäuren in der Gesundheit des Herz-Kreislauf-Systems und jeweilige Ernährungsbeispiele        | <input type="checkbox"/>  | <input type="checkbox"/>   | <input type="checkbox"/> | <input type="checkbox"/> | <input type="checkbox"/> |
| Die Rolle verschiedener Nahrungsfette (gesättigte, etc.) und jeweilige Ernährungsbeispiele                                    | <input type="checkbox"/>  | <input type="checkbox"/>   | <input type="checkbox"/> | <input type="checkbox"/> | <input type="checkbox"/> |
| Das Erkennen von Antioxidantien-reichen Lebensmitteln                                                                         | <input type="checkbox"/>  | <input type="checkbox"/>   | <input type="checkbox"/> | <input type="checkbox"/> | <input type="checkbox"/> |
| Der spezifische Brennwert von Proteinen, Kohlenhydraten und Fetten und ihre Rolle in grundlegenden Stoffwechselprozessen      | <input type="checkbox"/>  | <input type="checkbox"/>   | <input type="checkbox"/> | <input type="checkbox"/> | <input type="checkbox"/> |
| Die Rolle von Flüssigkeitszufuhr in der Gesundheit und der Flüssigkeitsbedarf angepasst an Aktivität und Alter                | <input type="checkbox"/>  | <input type="checkbox"/>   | <input type="checkbox"/> | <input type="checkbox"/> | <input type="checkbox"/> |
| Zöliakie und Managementstrategien für Ernährung und Lebensalltag des Patienten                                                | <input type="checkbox"/>  | <input type="checkbox"/>   | <input type="checkbox"/> | <input type="checkbox"/> | <input type="checkbox"/> |
| Nahrungsmittel-Malabsorption und Managementstrategien für Ernährung und Lebensalltag des Patienten                            | <input type="checkbox"/>  | <input type="checkbox"/>   | <input type="checkbox"/> | <input type="checkbox"/> | <input type="checkbox"/> |
| Die Rolle des glykämischen Index und der glykämischen Last in der diätetischen Behandlung                                     | <input type="checkbox"/>  | <input type="checkbox"/>   | <input type="checkbox"/> | <input type="checkbox"/> | <input type="checkbox"/> |
| Ballaststoffe in der Prävention von Krankheiten und Beispiele für entsprechende Lebensmittel                                  | <input type="checkbox"/>  | <input type="checkbox"/>   | <input type="checkbox"/> | <input type="checkbox"/> | <input type="checkbox"/> |
| Einschätzung von Gesamtkalorien, gesättigten Fettsäuren und Natriumgehalt mit Hilfe der Nährwertinformation bzw. Zutatenliste | <input type="checkbox"/>  | <input type="checkbox"/>   | <input type="checkbox"/> | <input type="checkbox"/> | <input type="checkbox"/> |
| Osteoporose mit Prävention/Behandlungsstrategien für Ernährung und Lebensalltag des Patienten                                 | <input type="checkbox"/>  | <input type="checkbox"/>   | <input type="checkbox"/> | <input type="checkbox"/> | <input type="checkbox"/> |
| Die Bestimmung des BMI (body mass index) und der Waist-to-hip-ratio (geschlechtsspezifisch) bzw. des Bauchumfangs             | <input type="checkbox"/>  | <input type="checkbox"/>   | <input type="checkbox"/> | <input type="checkbox"/> | <input type="checkbox"/> |
| Der Gesamtnutzen (Effekt) von aerober körperlicher Aktivität auf Gesundheit und Wohlbefinden                                  | <input type="checkbox"/>  | <input type="checkbox"/>   | <input type="checkbox"/> | <input type="checkbox"/> | <input type="checkbox"/> |

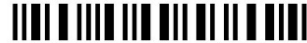

**B5. Welche Kostform wird im Leitfaden für Ernährungsmedizin in Klinik und Praxis (LEKuP) generell NICHT empfohlen?**

Vegane Diät ☐

Vegetarische Diät ☐

Mittelmeer-Diät ☐

Vollkost nach den DGE Empfehlungen ☐

Konsistenzmodifizierte Vollkost ☐

**B6. Wie hoch sollte der Anteil von Kohlenhydraten an der Gesamtenergiezufuhr bei der vollwertigen Mischkost nach DGE sein (Empfehlung für Gesunde)?**

10 % ☐

20 % ☐

30 % ☐

>50% ☐

>60% ☐

**B7. Wie hoch ist die maximal empfohlene Gesamtmenge an Kochsalz pro Tag nach DGE (Empfehlung für Gesunde)?**

2,3 g ☐

3,5 g ☐

6,0 g ☐

10 g ☐

17 g ☐

**B8. Welcher Anteil an freien Zuckern (Prozent der Gesamtenergie) ist nach DGE akzeptabel?**

Bis zu 5 EN% ☐

Bis zu 10 EN% ☐

Bis zu 15 EN% ☐

Bis zu 20 EN% ☐

Bis zu 40 EN% ☐

**B9. Auf wie viel g/kg Körpergewicht/Tag sollte die Proteinzufuhr bei einer schweren Mangelernährung angehoben werden?**

bis zu 0,5 g ☐

bis zu 0,8 g ☐

bis zu 2,0 g ☐

bis zu 3,4 g ☐

bis zu 4,5 g ☐

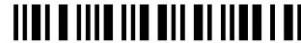

**B10. Welches Syndrom kann bei der Therapie von schwer mangelernährten Personen auftreten?**

- Refeeding-Syndrom ☐
- Waisting-Syndrom ☐
- Metabolisches-Syndrom ☐
- Kurzdarm-Syndrom ☐
- Brugada-Syndrom ☐

**B11. Welche Maßnahme ist ausgehend von den Prinzipien der Vollkostformen zur Therapie von Adipositas NICHT angezeigt?**

- ein Energiedefizit von 500-600 kcal/Tag ☐
- reduzierte Fettzufuhr ☐
- Bevorzugung von Lebensmitteln mit hoher Energiedichte ☐
- wasserreiche Lebensmittel ☐
- Proteinzufuhr wie bei Vollkost oder ↑ ☐

**B12. Was ist bei der Ernährung bei Gicht/Hyperurikämie am wenigstens bedenklich?**

- Süßigkeiten ☐
- Alkoholfreies Bier ☐
- kohlensäurereiches Mineralwasser mit Zitrone ☐
- Limonaden ☐
- Innereien ☐

**B13. Welches Monosaccharid ist bei erhöhten Harnsäurespiegeln besonders problematisch?**

- Glucose ☐
- Fructose ☐
- Galactose ☐
- Alle Monosaccharide sind gleichermaßen problematisch ☐
- Monosaccharide haben keinen Einfluss auf die Harnsäurespiegel ☐

**B14. Welche diätetische Maßnahme ist bei einer Dyslipoproteinämie vom Typ der Hypertriglyceridämie NICHT indiziert?**

- Normalisierung des Körpergewichts ☐
- Reduktion der Aufnahme einfach ungesättigter Fettsäuren unter 10 % der Gesamtenergie ☐
- Erhöhung der Aufnahme mehrfach ungesättigter Fettsäuren über 10 % der Gesamtenergie ☐
- Begrenzung der Aufnahme von Mono- und Disacchariden ☐
- Erhöhung der Aufnahme von löslichen Ballaststoffen ☐

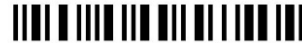

**B15. Welche Getreidesorte darf bei einer manifesten Zöliakie dennoch verzehrt werden?**

- Weizenvollkorn ☐
- Gerste ☐
- Dinkel ☐
- Hirse ☐
- Urgetreide (z.B. Urkorn, Einkorn und Emmer) ☐

**B16. Welche Maßnahmen sollten bei chronischen Nierenerkrankungen stadienspezifisch beachtet werden?**

- Proteinrestriktion in frühen Stadien ☐
- generelles Kaloriendefizit ☐
- erhöhter Phosphatkonsum (zum Beispiel über einen gesteigerten Käsekonsum) ☐
- Vitamin A-Substitution in allen Stadien ☐
- kaliumreiche Ernährung in allen Stadien (z.B. durch vermehrten Konsum von Hülsenfrüchten) ☐

**B17. Den Verzehr welcher Lebensmittel muss man bei Calciumoxalatsteinen NICHT vermeiden?**

- Rhabarber ☐
- Schokolade ☐
- Nüsse ☐
- Spinat ☐
- Eier ☐

**B18. Was verbessert die Fruktoseverträglichkeit bei Patienten mit einer Fruktosemalabsorption?**

- Zugabe von Salz ☐
- gleichzeitige Zufuhr von Glucose ☐
- isolierte Aufnahme von fruktosehaltigen Lebensmitteln ☐
- gleichzeitige Zufuhr von ungesättigten Fettsäuren ☐
- gleichzeitige Zufuhr von Laktose ☐

**B19. Welches dieser Öle enthält nur geringe Mengen Omega-3-Fettsäuren?**

- Rapsöl ☐
- Walnussöl ☐
- Leinöl ☐
- Sonnenblumenöl ☐
- Fischöl aus fettreichen Seefischen ☐

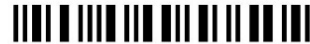

**B20. Welche Erkrankungen begründen keine Ausnahme für die empfohlene Kalziumzufuhr von 1000 mg/Tag und eine Vitamin D Zufuhr von 800 IE/Tag?**

- |                                      |                          |
|--------------------------------------|--------------------------|
| Primärer Hyperparathyroidismus       | <input type="checkbox"/> |
| glukokortikoidinduzierte Osteoporose | <input type="checkbox"/> |
| Kalziumoxalatsteine                  | <input type="checkbox"/> |
| Hyperkalzurie                        | <input type="checkbox"/> |
| aktive granulomatöse Erkrankungen    | <input type="checkbox"/> |

### Teil C: Fragen zum Wohlbefinden (WHO 5)

Zum Abschluss der Umfrage noch fünf letzte Fragen zu Ihrem Wohlbefinden

**C1. In den letzten zwei Wochen...**

|                                                              | Die ganze Zeit           | Meistens                 | Etwas mehr als die Hälfte der Zeit | Etwas weniger als die Hälfte der Zeit | Ab und zu                | Zu keinem Zeitpunkt      |
|--------------------------------------------------------------|--------------------------|--------------------------|------------------------------------|---------------------------------------|--------------------------|--------------------------|
| ...war ich froh und guter Laune                              | <input type="checkbox"/> | <input type="checkbox"/> | <input type="checkbox"/>           | <input type="checkbox"/>              | <input type="checkbox"/> | <input type="checkbox"/> |
| ...habe ich mich ruhig und entspannt gefühlt                 | <input type="checkbox"/> | <input type="checkbox"/> | <input type="checkbox"/>           | <input type="checkbox"/>              | <input type="checkbox"/> | <input type="checkbox"/> |
| ...habe ich mich energisch und aktiv gefühlt                 | <input type="checkbox"/> | <input type="checkbox"/> | <input type="checkbox"/>           | <input type="checkbox"/>              | <input type="checkbox"/> | <input type="checkbox"/> |
| ...habe ich mich beim Aufwachen frisch und ausgeruht gefühlt | <input type="checkbox"/> | <input type="checkbox"/> | <input type="checkbox"/>           | <input type="checkbox"/>              | <input type="checkbox"/> | <input type="checkbox"/> |
| ...war mein Alltag voller Dinge, die mich interessieren      | <input type="checkbox"/> | <input type="checkbox"/> | <input type="checkbox"/>           | <input type="checkbox"/>              | <input type="checkbox"/> | <input type="checkbox"/> |

**Vielen Dank für Ihre Teilnahme an der Umfrage! Wenn Sie uns noch ein kurzes Feedback in Schlagworten geben möchten, schreiben Sie uns bitte eine E-Mail an [kursmanager@cookuos-ev.de](mailto:kursmanager@cookuos-ev.de) Wir freuen uns auf Ihre Anregungen und Kritik.**

**Ihr Culinary Medicine Team**
